## PUBLISHER'S NOTE

# Expression of Concern: RyR1 and RyR3 isoforms provide distinct intracellular $\text{Ca}^{2+}$ signals in HEK 293 cells

**Daniela Rossi, Ilenia Simeoni, Marcella Micheli, Martin Bootman, Peter Lipp, Paul D. Allen and Vincenzo Sorrentino**

There was an error published in Fig. 6 in *J. Cell Sci.* (2002) **115**, 2497-2504 (doi:10.1242/jcs.115.12.2497).

There is a duplication of a segment of signal in Fig. 6A. According to the authors, this was due to an error in the process of assembling the trace. They made every effort to find the original data, but, as the work dates back more than twenty years, they were unable to recover the original files.

The authors state that this error does not significantly impact the interpretation of the article, the data reliability or the reader's understanding of the paper and that the scholarly integrity of the article remains intact. "Data reported in Fig. 6A and B aimed to illustrate variability of spontaneous  $\text{Ca}^{2+}$  signals in two RyR3-expressing cells; spontaneous  $\text{Ca}^{2+}$  release events are also reported in Fig. 5 and duplication of signal in Fig. 6Ab does not impact on the main interpretation of the article which was that HEK293 cells expressing RyR3 display spontaneous  $\text{Ca}^{2+}$  release events and those expressing RyR1 do not. This suggested that, at least in these cells, isoform-specific functional properties may contribute to generation of intracellular  $\text{Ca}^{2+}$  signals."

Without the original data, it is difficult to determine how the issues arose, so the journal is publishing this note to alert readers to our concerns, with the agreement of the authors.
